# Supplementary material
Source: PubMed Central journal article supplement (PMC2629802)
Supplement: NIHMS82761-supplement-table.pdf [file NIHMS82761-supplement-table.pdf]

Matarin et al -26- rlm (JW)

Supplementary Table 1. tSNPs, Primer Sequences, and Method of Genotyping

| tSNP      | Primer sequence                                                                                          | PCR program     |
|-----------|----------------------------------------------------------------------------------------------------------|-----------------|
| rs3212657 | F-TCCTGCCACCCAGTCAGT<br>FAM/VIC-ACATACAGACATAAGATG<br>R-GAAGAGAATGGGTTGGAGAGATAAGAAA                     | Assay-by-Design |
| rs1645761 | F-CTCAAAACCACTGCTCCTTACATG<br>FAM/VIC-ATGTGAACCGTAAGTAA<br>R-AGACAATTCATTCAAGGGCTGCT                     | Assay-by-Design |
| rs3756541 | F-GAGAAGTGGCTTGGAACAGGG<br>R-GCCACCATCTGGTAGACTTGCC                                                      | 65TD55          |
| rs1862639 | F-CTGCCTCCCTCAAAGTCCTATT<br>R-CCTTGATAAACTGAGGTGCA<br>S1-CAGCTTCCTCCTTAGRG                               | 65TD55          |
| rs152088  | F-GCTTTTGGCATCTTTATCATGAAATCCT<br>FAM/VIC-CCATTCCAAACATTG<br>R-GCAAAACCTGAAAGTATAAAACCTGGAA              | Assay-by-Design |
| rs3212418 | F-CAAGTTATCATACAGATATGAACAAGTTTATACAAGACT<br>FAM/VIC-CAATTCCATAGAACTCT<br>R-TTTCATCTCAGTAACTCAAATGGTCACA | Assay-by-Design |
| rs989073  | F-GGAATAGCCTCTTGGTGATGT<br>R-AAGGCCTCGGTGAAATCC<br>S1-ATAGCCTCTTGGTGATG                                  | 65TD55          |

Supplementary Table 1 (continued)

| tSNP       | Primer sequence                                                                                       | PCR program     |
|------------|-------------------------------------------------------------------------------------------------------|-----------------|
| rs1363192  | F-ACAATGATTGTTCTGATGTTATTTTTTCAGTTGAG<br>FAM/VIC-CTAAGACAAATCACATGCC<br>R-CCACTGCCACATGTGAAAACTAAA    | Assay-by-Design |
| rs3212460  | F-GCTCTGCAGCCTCACACATTAA<br>FAM/VIC-AACGCAATGCTTTC<br>R-GCATTGAATTTAGTGTCATCAATATAGGTAAGT             | Assay-by-Design |
| rs3212476  | F-CAGCGTTAGTACTGCAGTTAATTG<br>FAM/VIC-CTTTGCCCACTTCC<br>R-CACAAATGAGGTTCACTGACTACCA                   | Assay-by-Design |
| rs984966   | F-GTTGCTGACAATAAAGGGTTGTTCT<br>FAM/VIC-ATGGCTTTACCCCCC<br>R-ATTTTCTCAGTATTCTAAGTAAGTCTAAAGAGTTTAGTTTT | Assay-by-Design |
| rs10513009 | F-GGTGTCTTGGTAAGTGGGTAACA<br>FAM/VIC-CCTGTGAAATTTGT<br>R-TCTAAGTGTGAGTTAAAGTGATATCGACCT               | Assay-by-Design |
| rs2303124  | F-CCTTCAAGGGATTGTGGGACTATATC<br>FAM/VIC-CACTCTTACCCTATCCAT<br>R-TGCTGATTATCTCCTGAGGCTATCT             | Assay-by-Design |

PCR, polymerase chain reaction; tSNP, haplotype-tagging single nucleotide polymorphism.

Matarin et al -28- rlm (JW)

Supplementary Table 2. Demographic and Clinical Characteristics of SWISS  
 Probands, ISGS Cases and Controls, and MSGD Cases and  
 Controls\*

| Variable                    | Cases (n=484)  | Controls (n=263) | P value |
|-----------------------------|----------------|------------------|---------|
| Age, mean±SD, y             | 65.6±14.2      | 60.0±14.7        | <0.001  |
| Female                      | 226/484 (46.7) | 163/263 (62.0)   | <0.001  |
| White                       | 379/484 (78.3) | 210/263 (79.8)   | 0.62    |
| Risk factors                |                |                  |         |
| Myocardial infarction       | 82/482 (17.0)  | 15/263 (5.7)     | <0.001  |
| AF                          | 71/480 (14.8)  | 18/262 (6.9)     | 0.002   |
| Chronic AF                  | 35/480 (7.3)   | 10/262 (3.8)     | 0.06    |
| Paroxysmal AF               | 40/478 (8.4)   | 9/262 (3.4)      | 0.01    |
| Ever smoking                | 318/481 (66.1) | 124/263 (47.1)   | <0.001  |
| Hypertension                | 335/482 (69.5) | 101/260 (38.9)   | <0.001  |
| Hyperlipidemia <sup>†</sup> | 215/433 (49.7) | 56/211 (26.6)    | <0.001  |
| Diabetes mellitus           | 119/484 (24.6) | 34/263 (12.9)    | <0.001  |
| Family history of<br>stroke | 252/481 (52.4) | 88/263 (33.5)    | <0.001  |

AF, atrial fibrillation; ISGS, Ischemic Stroke Genetics Study; MSGD, Mayo Stroke Genetics Databank; SWISS, Siblings With Ischemic Stroke Study.

\*Values are presented as number (percentage) unless indicated otherwise.

<sup>†</sup>Missing in MSGD cohort.

Supplementary Table 3. tSNP Association Analysis (Adjusted for Age, Sex, Myocardial Infarction, Atrial Fibrillation, Smoking, Family History, and Diabetes Status) for Ischemic Stroke in White Patients

| tSNP major/minor | Location | Group   | No. of genotypes* |     |    | Association ( <i>P</i> value) |          |          |           |
|------------------|----------|---------|-------------------|-----|----|-------------------------------|----------|----------|-----------|
|                  |          |         | 11                | 12  | 22 | General                       | Dominant | Additive | Recessive |
| rs3212657 T/C    | 52324239 | Total   | 456               | 117 | 14 | 0.15                          | 0.06     | 0.15     | 0.32      |
|                  |          | Case    | 301               | 71  | 6  |                               |          |          |           |
|                  |          | Control | 155               | 46  | 8  |                               |          |          |           |
| rs1645761 A/G    | 52332999 | Total   | 442               | 135 | 11 | 0.18                          | 0.32     | 0.06     | 0.08      |
|                  |          | Case    | 293               | 81  | 5  |                               |          |          |           |
|                  |          | Control | 149               | 54  | 6  |                               |          |          |           |
| rs3756541 C/T    | 52338852 | Total   | 294               | 205 | 59 | 0.03                          | 0.07     | 0.009    | 0.01      |
|                  |          | Case    | 177               | 139 | 43 |                               |          |          |           |
|                  |          | Control | 117               | 66  | 16 |                               |          |          |           |
| rs1862639 C/T    | 52343127 | Total   | 373               | 193 | 22 | 0.65                          | 0.36     | 0.56     | 0.75      |
|                  |          | Case    | 243               | 125 | 11 |                               |          |          |           |
|                  |          | Control | 130               | 68  | 11 |                               |          |          |           |

Matarin et al -30- rlm (JW)

Supplementary Table 3 (continued)

| tSNP major/minor | Location | Group   | No. of genotypes* |     |     | Association ( <i>P</i> value) |          |          |           |
|------------------|----------|---------|-------------------|-----|-----|-------------------------------|----------|----------|-----------|
|                  |          |         | 11                | 12  | 22  | General                       | Dominant | Additive | Recessive |
| rs152088 C/T     | 52344772 | Total   | 403               | 160 | 22  | 0.56                          | 0.38     | 0.31     | 0.40      |
|                  |          | Case    | 267               | 100 | 11  |                               |          |          |           |
|                  |          | Control | 136               | 60  | 11  |                               |          |          |           |
| rs3212418 T/C    | 52351929 | Total   | 195               | 271 | 116 | 0.34                          | 0.28     | 0.14     | 0.18      |
|                  |          | Case    | 136               | 172 | 67  |                               |          |          |           |
|                  |          | Control | 59                | 99  | 49  |                               |          |          |           |
| rs989073 C/A     | 52369177 | Total   | 257               | 237 | 70  | 0.54                          | 0.32     | 0.70     | 0.89      |
|                  |          | Case    | 169               | 152 | 45  |                               |          |          |           |
|                  |          | Control | 88                | 85  | 25  |                               |          |          |           |
| rs1363192 A/C    | 52373840 | Total   | 294               | 243 | 50  | 0.14                          | 0.09     | 0.63     | 0.70      |
|                  |          | Case    | 186               | 169 | 24  |                               |          |          |           |
|                  |          | Control | 108               | 74  | 26  |                               |          |          |           |

Supplementary Table 3 (continued)

| tSNP major/minor | Location | Group   | No. of genotypes* |     |    | Association ( <i>P</i> value) |          |          |           |
|------------------|----------|---------|-------------------|-----|----|-------------------------------|----------|----------|-----------|
|                  |          |         | 11                | 12  | 22 | General                       | Dominant | Additive | Recessive |
| rs3212460 C/T    | 52376431 | Total   | 544               | 23  | 21 | 0.29                          | 0.12     | 0.19     | 0.34      |
|                  |          | Case    | 349               | 15  | 15 |                               |          |          |           |
|                  |          | Control | 195               | 8   | 6  |                               |          |          |           |
| rs3212476 C/G    | 52379113 | Total   | 325               | 220 | 41 | 0.31                          | 0.96     | 0.24     | 0.14      |
|                  |          | Case    | 216               | 137 | 25 |                               |          |          |           |
|                  |          | Control | 109               | 83  | 16 |                               |          |          |           |
| rs984966 T/A     | 52404679 | Total   | 201               | 288 | 98 | 0.95                          | 0.86     | 0.76     | 0.76      |
|                  |          | Case    | 131               | 187 | 60 |                               |          |          |           |
|                  |          | Control | 70                | 101 | 38 |                               |          |          |           |
| rs10513009 C/T   | 52407631 | Total   | 487               | 94  | 7  | 0.18                          | 0.07     | 0.19     | 0.36      |
|                  |          | Case    | 314               | 63  | 2  |                               |          |          |           |
|                  |          | Control | 173               | 31  | 5  |                               |          |          |           |

Matarin et al -32- rlm (JW)

Supplementary Table 3 (continued)

| tSNP major/minor | Location | Group   | No. of genotypes* |     |     | Association ( <i>P</i> value) |          |          |           |
|------------------|----------|---------|-------------------|-----|-----|-------------------------------|----------|----------|-----------|
|                  |          |         | 11                | 12  | 22  | General                       | Dominant | Additive | Recessive |
| rs2303124 C/T    | 52414713 | Total   | 235               | 221 | 112 | 0.08                          | 0.55     | 0.08     | 0.03      |
|                  |          | Case    | 142               | 150 | 75  |                               |          |          |           |
|                  |          | Control | 93                | 71  | 37  |                               |          |          |           |

tSNP, haplotype-tagging single nucleotide polymorphism.

\*Genotype 11 indicates the presence of both major alleles; genotype 12, 1 major allele and 1 minor allele; and genotype 22, both minor alleles.

Supplementary Table 4. tSNP Association Analysis (Adjusted for Age, Sex, Myocardial Infarction, Atrial Fibrillation, Smoking, Family History, and Diabetes Status) for Ischemic Stroke in Nonwhite Patients

| tSNP major/minor | Location | Group   | No. of genotypes* |    |    | Association ( <i>P</i> value) |          |          |           |
|------------------|----------|---------|-------------------|----|----|-------------------------------|----------|----------|-----------|
|                  |          |         | 11                | 12 | 22 | General                       | Dominant | Additive | Recessive |
| rs3212657 T/C    | 52324239 | Total   | 139               | 18 | 0  | ...                           | ...      | 0.71     | 0.71      |
|                  |          | Case    | 94                | 11 | 0  |                               |          |          |           |
|                  |          | Control | 45                | 7  | 0  |                               |          |          |           |
| rs1645761 A/G    | 52332999 | Total   | 76                | 63 | 19 | 0.21                          | 0.08     | 0.11     | 0.28      |
|                  |          | Case    | 53                | 42 | 10 |                               |          |          |           |
|                  |          | Control | 23                | 21 | 9  |                               |          |          |           |
| rs3756541 C/T    | 52338852 | Total   | 115               | 32 | 3  | <0.001                        | ...      | 0.02     | 0.02      |
|                  |          | Case    | 70                | 25 | 3  |                               |          |          |           |
|                  |          | Control | 45                | 7  | 0  |                               |          |          |           |
| rs1862639 C/T    | 52343127 | Total   | 90                | 59 | 8  | 0.34                          | 0.31     | 0.14     | 0.19      |
|                  |          | Case    | 63                | 37 | 4  |                               |          |          |           |
|                  |          | Control | 27                | 22 | 4  |                               |          |          |           |



Matarin et al -34- rlm (JW)

Supplementary Table 4 (continued)

| tSNP major/minor | Location | Group   | No. of genotypes* |    |    | Association ( <i>P</i> value) |          |          |           |
|------------------|----------|---------|-------------------|----|----|-------------------------------|----------|----------|-----------|
|                  |          |         | 11                | 12 | 22 | General                       | Dominant | Additive | Recessive |
| rs152088 C/T     | 52344772 | Total   | 96                | 50 | 12 | 0.61                          | 0.39     | 0.35     | 0.46      |
|                  |          | Case    | 68                | 31 | 6  |                               |          |          |           |
|                  |          | Control | 28                | 19 | 6  |                               |          |          |           |
| rs3212418 T/C    | 52351929 | Total   | 18                | 72 | 68 | 0.13                          | 0.04     | 0.08     | 0.60      |
|                  |          | Case    | 14                | 52 | 39 |                               |          |          |           |
|                  |          | Control | 4                 | 20 | 29 |                               |          |          |           |
| rs989073 C/A     | 52369177 | Total   | 71                | 69 | 15 | 0.47                          | 0.24     | 0.28     | 0.48      |
|                  |          | Case    | 48                | 47 | 8  |                               |          |          |           |
|                  |          | Control | 23                | 22 | 7  |                               |          |          |           |
| rs1363192 A/C    | 52373840 | Total   | 86                | 56 | 16 | 0.35                          | 0.22     | 0.16     | 0.24      |
|                  |          | Case    | 59                | 38 | 8  |                               |          |          |           |
|                  |          | Control | 27                | 18 | 8  |                               |          |          |           |

Supplementary Table 4 (continued)

| tSNP major/minor | Location | Group   | No. of genotypes* |    |    | Association ( <i>P</i> value) |          |          |           |
|------------------|----------|---------|-------------------|----|----|-------------------------------|----------|----------|-----------|
|                  |          |         | 11                | 12 | 22 | General                       | Dominant | Additive | Recessive |
| rs3212460 C/T    | 52376431 | Total   | 143               | 10 | 5  | 0.63                          | 0.64     | 0.39     | 0.34      |
|                  |          | Case    | 93                | 8  | 4  |                               |          |          |           |
|                  |          | Control | 50                | 2  | 1  |                               |          |          |           |
| rs3212476 C/G    | 52379113 | Total   | 54                | 82 | 22 | 0.42                          | 0.50     | 0.77     | 0.37      |
|                  |          | Case    | 35                | 57 | 13 |                               |          |          |           |
|                  |          | Control | 19                | 25 | 9  |                               |          |          |           |
| rs984966 T/A     | 52404679 | Total   | 73                | 67 | 18 | 0.78                          | 0.48     | 0.64     | 0.85      |
|                  |          | Case    | 49                | 45 | 11 |                               |          |          |           |
|                  |          | Control | 24                | 22 | 7  |                               |          |          |           |
| rs10513009 C/T   | 52407631 | Total   | 113               | 38 | 6  | 0.33                          | 0.24     | 0.98     | 0.61      |
|                  |          | Case    | 72                | 29 | 3  |                               |          |          |           |
|                  |          | Control | 41                | 9  | 3  |                               |          |          |           |

Matarin et al -36- rlm (JW)

Supplementary Table 4 (continued)

| tSNP major/minor | Location | Group   | No. of genotypes* |    |    | Association ( <i>P</i> value) |          |          |           |
|------------------|----------|---------|-------------------|----|----|-------------------------------|----------|----------|-----------|
|                  |          |         | 11                | 12 | 22 | General                       | Dominant | Additive | Recessive |
| rs2303124 C/T    | 52414713 | Total   | 124               | 24 | 2  | 0.06                          | 0.08     | 0.44     | 0.20      |
|                  |          | Case    | 80                | 19 | 1  |                               |          |          |           |
|                  |          | Control | 44                | 5  | 1  |                               |          |          |           |

tSNP, haplotype-tagging single nucleotide polymorphism.

\*Genotype 11 indicates the presence of both major alleles; genotype 12, 1 major allele and 1 minor allele; and genotype 22, both minor alleles.

Supplementary Table 5. tSNP Association (Unadjusted Analysis) and Haplotype Structure in White

Patients\*

| tSNP name              | tSNP no. | White |      |      |      | Haplotype marker |      |      |      |      |
|------------------------|----------|-------|------|------|------|------------------|------|------|------|------|
|                        |          | 2 df  | Dom  | Add  | Rec  | 1                | 2    | 3    | 4    | 5    |
| rs3212657              | 1        | 0.13  | 0.13 | 0.06 | 0.09 | 0.06             | 0.17 | 0.11 | 0.18 | 0.28 |
| rs1645761              | 2        | 0.17  | 0.11 | 0.07 | 0.18 | 0.07             | 0.03 | 0.09 | 0.24 | 0.44 |
| rs3756541 <sup>†</sup> | 3        | 0.08  | 0.03 | 0.02 | 0.15 | 0.02             | 0.09 | 0.21 | 0.30 | 0.45 |
| rs1862639              | 4        | 0.35  | 0.64 | 0.38 | 0.15 | 0.38             | 0.20 | 0.31 | 0.28 | 0.29 |
| rs152088               | 5        | 0.24  | 0.22 | 0.12 | 0.14 | 0.12             | 0.09 | 0.06 | 0.13 | 0.10 |
| rs3212418              | 6        | 0.09  | 0.06 | 0.03 | 0.09 | 0.03             | 0.01 | 0.10 | 0.12 | 0.17 |
| rs989073               | 7        | 0.92  | 0.70 | 0.73 | 0.91 | 0.73             | 0.80 | 0.28 | 0.23 | 0.45 |
| rs1363192              | 8        | 0.01  | 0.51 | 0.55 | 0.01 | 0.55             | 0.05 | 0.06 | 0.13 | 0.22 |
| rs3212460 <sup>†</sup> | 9        | 0.79  | 0.59 | 0.52 | 0.50 | 0.40             | 0.48 | 0.15 | 0.12 | 0.09 |
| rs3212476              | 10       | 0.54  | 0.27 | 0.28 | 0.62 | 0.28             | 0.42 | 0.16 | 0.66 | ...  |
| rs984966               | 11       | 0.77  | 0.78 | 0.56 | 0.47 | 0.56             | 0.68 | 0.50 | ...  | ...  |
| rs10513009             | 12       | 0.13  | 0.94 | 0.55 | 0.05 | 0.58             | 0.36 | ...  | ...  | ...  |
| rs2303124 <sup>†</sup> | 13       | 0.21  | 0.08 | 0.14 | 0.56 | 0.11             | ...  | ...  | ...  | ...  |

## Supplementary Table 5 (continued)

Add, additive; df, degrees of freedom; Dom, dominant; Rec, recessive; tSNP, haplotype-tagging single nucleotide polymorphism.

\*tSNPs listed in order of position on the physical map. Haplotype data are reported as empiric *P* values.

†Not in Hardy-Weinberg equilibrium.

Supplementary Table 6. tSNP Association (Unadjusted Analysis) and Haplotype Structure in Nonwhite Patients\*

| tSNP name  | tSNP no. | Nonwhite |      |      |      | Haplotype marker |      |      |       |       |
|------------|----------|----------|------|------|------|------------------|------|------|-------|-------|
|            |          | 2 df     | Dom  | Add  | Rec  | 1                | 2    | 3    | 4     | 5     |
| rs3212657  | 1        | 0.78     | 0.51 | 0.49 | 0.72 | 0.60             | 0.04 | 0.02 | 0.004 | 0.004 |
| rs1645761  | 2        | 0.37     | 0.40 | 0.21 | 0.17 | 0.19             | 0.06 | 0.02 | 0.006 | 0.02  |
| rs3756541† | 3        | 0.14     | 0.05 | 0.05 | 0.34 | 0.02             | 0.06 | 0.02 | 0.05  | 0.30  |
| rs1862639  | 4        | 0.38     | 0.24 | 0.17 | 0.30 | 0.19             | 0.04 | 0.08 | 0.18  | 0.20  |
| rs152088   | 5        | 0.26     | 0.15 | 0.10 | 0.21 | 0.09             | 0.08 | 0.15 | 0.08  | 0.10  |
| rs3212418  | 6        | 0.10     | 0.04 | 0.04 | 0.28 | 0.04             | 0.06 | 0.02 | 0.06  | 0.16  |
| rs989073   | 7        | 0.53     | 0.78 | 0.47 | 0.26 | 0.47             | 0.13 | 0.26 | 0.40  | 0.09  |
| rs1363192  | 8        | 0.34     | 0.53 | 0.26 | 0.14 | 0.24             | 0.19 | 0.45 | 0.12  | 0.40  |
| rs3212460† | 9        | 0.63     | 0.34 | 0.39 | 0.64 | 0.17             | 0.44 | 0.47 | 0.91  | 0.65  |
| rs3212476  | 10       | 0.62     | 0.75 | 0.85 | 0.43 | 0.86             | 0.63 | 0.87 | 0.49  | ...   |
| rs984966   | 11       | 0.88     | 0.87 | 0.72 | 0.61 | 0.71             | 0.82 | 0.43 | ...   | ...   |
| rs10513009 | 12       | 0.26     | 0.32 | 0.64 | 0.36 | 0.54             | 0.24 | ...  | ...   | ...   |
| rs2303124† | 13       | 0.35     | 0.28 | 0.46 | 0.54 | 0.32             | ...  | ...  | ...   | ...   |

## Supplementary Table 6 (continued)

Add, additive; df, degrees of freedom; Dom, dominant; Rec, recessive; tSNP, haplotype-tagging single nucleotide polymorphism.

\*tSNPs listed in order of position on the physical map. Haplotype data are reported as empiric *P* values.

†Not in Hardy-Weinberg equilibrium.

Supplementary Table 7. Significant Haplotypes Based on 2-, 3-, 4-, 5-tSNP Window Analyses Including/Excluding tSNPs not in Hardy-Weinberg Equilibrium (Overall Data)

| tSNP name                                                      | tSNP no. | Haplotype marker                   |                                    |                                     |                                       |
|----------------------------------------------------------------|----------|------------------------------------|------------------------------------|-------------------------------------|---------------------------------------|
|                                                                |          | 2<br><i>P</i> value<br>OR (95% CI) | 3<br><i>P</i> value<br>OR (95% CI) | 4<br><i>P</i> value<br>OR (95% CI)  | 5<br><i>P</i> value<br>OR (95% CI)    |
| Analysis including tSNPs not in the Hardy-Weinberg equilibrium |          |                                    |                                    |                                     |                                       |
| rs3212657                                                      | 1        | C.G<br>0.04<br>0.58 (0.40-0.84)    | T.A.T<br>0.04<br>1.47 (1.14-1.89)  | T.A.T.C<br>0.03<br>1.49 (1.15-1.94) | ...                                   |
| rs1645761                                                      | 2        | A.T<br>0.04<br>1.45 (1.12-1.87)    | A.T.C<br>0.04<br>1.45 (1.12-1.88)  | ...                                 | A.T.C.C.T<br>0.04<br>1.46 (1.12-1.89) |
| rs3756541*                                                     | 3        | T.C<br>0.03<br>1.49 (1.15-1.93)    | T.C.C<br>0.05<br>1.43 (1.10-1.85)  | T.C.C.T<br>0.04<br>1.47 (1.13-1.91) | ...                                   |



Matarin et al -42- rlm (JW)

Supplementary Table 7 (continued)

| tSNP name  | tSNP no. | Haplotype marker                |                |                |                                       |
|------------|----------|---------------------------------|----------------|----------------|---------------------------------------|
|            |          | 2                               | 3              | 4              | 5                                     |
|            |          | <i>P</i> value                  | <i>P</i> value | <i>P</i> value | <i>P</i> value                        |
|            |          | OR (95% CI)                     | OR (95% CI)    | OR (95% CI)    | OR (95% CI)                           |
| rs1862639  | 4        | C.C<br>0.06<br>1.35 (1.09-1.67) | ...            | ...            | ...                                   |
| rs152088   | 5        | C.T<br>0.06<br>1.34 (1.08-1.66) | ...            | ...            | ...                                   |
| rs3212418  | 6        | ...                             | ...            | ...            | ...                                   |
| rs3212460* | 9        | ...                             | ...            | ...            | C.C.T.C.T<br>0.02<br>1.60 (1.22-2.11) |

Supplementary Table 7 (continued)

| tSNP name                                                  | tSNP no. | Haplotype marker |                  |                  |                |
|------------------------------------------------------------|----------|------------------|------------------|------------------|----------------|
|                                                            |          | 2                | 3                | 4                | 5              |
|                                                            |          | <i>P</i> value   | <i>P</i> value   | <i>P</i> value   | <i>P</i> value |
|                                                            |          | OR (95% CI)      | OR (95% CI)      | OR (95% CI)      | OR (95% CI)    |
| rs3212476                                                  | 10       | ...              | ...              | C.T.C.T          | ...            |
|                                                            |          |                  |                  | 0.03             |                |
|                                                            |          |                  |                  | 1.54 (1.17-2.02) |                |
| rs984966                                                   | 11       | ...              | ...              | ...              | ...            |
| rs10513009                                                 | 12       | ...              | ...              | ...              | ...            |
| rs2303124*                                                 | 13       | ...              | ...              | ...              | ...            |
| Analysis excluding tSNPs not in Hardy-Weinberg equilibrium |          |                  |                  |                  |                |
| rs321657                                                   | 1        | C.G              | C.G.C            | ...              | ...            |
|                                                            |          | 0.04             | 0.04             |                  |                |
|                                                            |          | 0.58 (0.40-0.84) | 0.58 (0.40-0.84) |                  |                |

Matarin et al -44- rlm (JW)

Supplementary Table 7 (continued)

| tSNP name | tSNP no. | Haplotype marker |                  |                |                |
|-----------|----------|------------------|------------------|----------------|----------------|
|           |          | 2                | 3                | 4              | 5              |
|           |          | <i>P</i> value   | <i>P</i> value   | <i>P</i> value | <i>P</i> value |
|           |          | OR (95% CI)      | OR (95% CI)      | OR (95% CI)    | OR (95% CI)    |
| rs1645761 | 2        | A.C              | A.C.C            | ...            | ...            |
|           |          | 0.05             | 0.04             |                |                |
|           |          | 1.36 (1.09-1.69) | 1.36 (1.10-1.68) |                |                |
| rs1862639 | 4        | C.C              | ...              | ...            | ...            |
|           |          | 0.06             |                  |                |                |
|           |          | 1.35 (1.09-1.67) |                  |                |                |
| rs152088  | 5        | C.T              | ...              | ...            | ...            |
|           |          | 0.06             |                  |                |                |
|           |          | 1.34 (1.08-1.66) |                  |                |                |

CI, confidence interval; OR, odds ratio; tSNP, haplotype-tagging single nucleotide polymorphism.

\*Not in Hardy-Weinberg equilibrium.

Supplementary Table 8. Significant Haplotypes Based on 2-, 3-, 4-, 5-tSNP Window Analyses Including tSNPs not in Hardy-Weinberg Equilibrium (White Group)\*

| tSNP name  | tSNP no. | Haplotype marker              |                                   |                                     |                                       |
|------------|----------|-------------------------------|-----------------------------------|-------------------------------------|---------------------------------------|
|            |          | 2                             | 3                                 | 4                                   | 5                                     |
|            |          | <i>P</i> value<br>OR (95% CI) | <i>P</i> value<br>OR (95% CI)     | <i>P</i> value<br>OR (95% CI)       | <i>P</i> value<br>OR (95% CI)         |
| rs3212657  | 1        | ...                           | T.A.T<br>0.05<br>1.47 (1.11-1.93) | T.A.T.C<br>0.04<br>1.49 (1.13-1.96) | ...                                   |
| rs1645761  | 2        | ...                           | A.T.C<br>0.06<br>1.45 (1.10-1.91) | ...                                 | A.T.C.C.T<br>0.06<br>1.46 (1.11-1.93) |
| rs3756541† | 3        | ...                           | ...                               | C.T.T.C<br>0.06<br>1.47 (1.11-1.94) | ...                                   |
| rs1862639  | 4        | ...                           | ...                               | ...                                 | ...                                   |
| rs152088   | 5        | ...                           | ...                               | ...                                 | ...                                   |

Matarin et al -46- rlm (JW)

Supplementary Table 8 (continued)

| tSNP name              | tSNP no. | Haplotype marker              |                               |                                     |                                       |
|------------------------|----------|-------------------------------|-------------------------------|-------------------------------------|---------------------------------------|
|                        |          | 2                             | 3                             | 4                                   | 5                                     |
|                        |          | <i>P</i> value<br>OR (95% CI) | <i>P</i> value<br>OR (95% CI) | <i>P</i> value<br>OR (95% CI)       | <i>P</i> value<br>OR (95% CI)         |
| rs3212418              | 6        | ...                           | ...                           | ...                                 | ...                                   |
| rs989073               | 7        | ...                           | ...                           | ...                                 | ...                                   |
| rs1363192              | 8        | ...                           | ...                           | ...                                 | ...                                   |
| rs3212460 <sup>†</sup> | 9        | ...                           | ...                           | ...                                 | C.C.T.C.T<br>0.02<br>1.65 (1.23-2.21) |
| rs3212476              | 10       | ...                           | ...                           | C.T.C.T<br>0.04<br>1.52 (1.15-2.03) | ...                                   |
| rs984966               | 11       | ...                           | ...                           | ...                                 | ...                                   |
| rs10513009             | 12       | ...                           | ...                           | ...                                 | ...                                   |
| rs2303124 <sup>†</sup> | 13       | ...                           | ...                           | ...                                 | ...                                   |

Supplementary Table 8 (continued)

CI, confidence interval; OR, odds ratio; tSNP, haplotype-tagging single nucleotide polymorphism.

\*No significant results excluding tSNPs not in Hardy-Weinberg equilibrium.

†Not in Hardy-Weinberg equilibrium.

Confidential: For Review Only

Matarin et al -48- rlm (JW)

Supplementary Table 9. Significant Haplotypes Based on 2-, 3-, 4-, 5-tSNP Window Analyses  
Excluding tSNPs not in Hardy-Weinberg Equilibrium (Nonwhite  
Patients)\*

| tSNP name | tSNP no. | Haplotype marker |                  |                  |                  |
|-----------|----------|------------------|------------------|------------------|------------------|
|           |          | 2                | 3                | 4                | 5                |
|           |          | <i>P</i> value   | <i>P</i> value   | <i>P</i> value   | <i>P</i> value   |
|           |          | OR (95% CI)      | OR (95% CI)      | OR (95% CI)      | OR (95% CI)      |
| rs3212657 | 1        | ...              | ...              | T.A.C.C          | T.A.C.C.T        |
|           |          |                  |                  | 0.03             | 0.03             |
|           |          |                  |                  | 2.52 (1.34-4.74) | 2.62 (1.37-5.00) |
| rs1645761 | 2        | A.C              | A.C.C            | A.C.C.T          | ...              |
|           |          | 0.06             | 0.04             | 0.04             |                  |
|           |          | 1.91 (1.18-3.09) | 3.02 (1.61-5.67) | 2.51 (1.32-4.78) |                  |
| rs1862639 | 4        | ...              | ...              | ...              | ...              |
| rs152088  | 5        | ...              | ...              | ...              | ...              |
| rs3212418 | 6        | ...              | ...              | ...              | ...              |

CI, confidence interval; OR, odds ratio; tSNP, haplotype-tagging single nucleotide polymorphism.

\*No significant results involving tSNPs not in Hardy-Weinberg equilibrium.
